# Supplementary material for: Synthesis of indoles via dehydrogenative N-heterocyclization by supported platinum catalysts
Source: Royal Society of Chemistry journal article supplement (doi:10.1039/c4ra11893f), 2014-11-25
Supplement: c4ra11893f1.pdf [file c4ra11893f1.pdf]

## Supporting Information

### Synthesis of indoles via dehydrogenative *N*-heterocyclization by supported platinum catalysts

Sondomoyee Konika Moromi,<sup>a</sup> Abeda Sultana Touchy,<sup>a</sup> S. M. A. Hakim Siddiki,<sup>b</sup> Md. Ayub Ali,<sup>a</sup>  
Ken-ichi Shimizu<sup>\*a,b</sup>

<sup>a</sup> Catalysis Research Center, Hokkaido University, N-21, W-10, Sapporo 001-0021, Japan

<sup>b</sup> Elements Strategy Initiative for Catalysts and Batteries, Kyoto University, Katsura, Kyoto 615-8520, Japan

\*Corresponding author: Ken-ichi Shimizu, e-mail: [kshimizu@cat.hokudai.ac.jp](mailto:kshimizu@cat.hokudai.ac.jp)

#### NMR and GC/MS analysis

<sup>1</sup>H and <sup>13</sup>C NMR spectra for synthesized compounds were assigned and reproduced to the corresponding literature. <sup>1</sup>H and <sup>13</sup>C NMR spectra were recorded using at ambient temperature on JEOL-ECX 600 operating at 600.17 and 150.92 MHz, respectively with tetramethylsilane as an internal standard. All chemical shifts ( $\delta$ ) are reported in ppm and coupling constants ( $J$ ) in Hz. All chemical shifts are reported relative to tetramethylsilane and *d*-solvent (CDCl<sub>3</sub>) peaks respectively. Abbreviations used in the NMR experiments: s, singlet; d, doublet; t, triplet; q, quartet; m, multiplet. GC-MS spectra was taken by SHIMADZU QP2010.

**Indole:**<sup>1</sup>

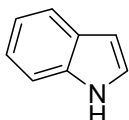

<sup>1</sup>H NMR (600.17 MHz, CDCl<sub>3</sub>, TMS):  $\delta$  7.91 (brs, 1H), 7.64 (d,  $J$  = 8.28 Hz, 1H), 7.31 (d,  $J$  = 8.22 Hz, 1H), 7.19-7.16 (m, 1H), 7.13-7.09 (m, 2H), 6.53 (d,  $J$  = 2.04 Hz, 1H); <sup>13</sup>C NMR (150.92 MHz, CDCl<sub>3</sub>)  $\delta$  135.65, 127.73, 124.12, 121.90, 120.66, 119.74, 111.01, 102.45; GC-MS *m/e* 117.055.

**4-Chloro-1*H*-indole:**<sup>1</sup>

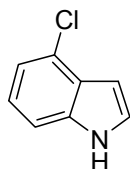

<sup>1</sup>H NMR (600.17 MHz, CDCl<sub>3</sub>, TMS):  $\delta$  8.25 (brs, 1H), 7.29 (d,  $J$  = 7.56 Hz, 1H), 7.25-7.22 (m, 1H), 7.13-7.09 (m, 2H), 7.13-7.09 (m, 2H), 6.66 (t like d,  $J$  = 3.42 Hz, 1H); <sup>13</sup>C NMR (150.92 MHz, CDCl<sub>3</sub>)  $\delta$  136.42, 126.73, 126.12, 124.63, 122.57, 119.57, 109.62, 101.35; GC-MS *m/e* 151.020.

**2-(2-Chloro-6-nitro-phenyl)-ethanol:<sup>2</sup>**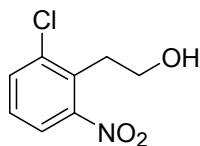

A typical reaction procedure is described for the synthesis of 2-(2-Chloro-6-nitro-phenyl)-ethanol. 2-chloro-6 nitro toluene (6.3 g, 36.5 mmol), paraformaldehyde (91 mmol), DMSO (20 mL), and Triton B ( Benzenetrimethylammonium hydroxide, 40% solution of MeOH, 1.0 mL), were placed in a 100-mL three necked round bottomed flask equipped with a reflux condenser. The reaction mixture was stirred for 8 h at 90°C. Then the reaction mixture was quenched with saturated NH<sub>4</sub>Cl solution, the organic compounds were extracted with ethylacetate. The combined organic layers were washed with brine and dried over Na<sub>2</sub>SO<sub>4</sub>. After removal of the solvent, the residue was subjected to column chromatography (*n*-hexane:AcOEt = 4:1) to give 2-(2-Chloro-6-nitro-phenyl)-ethanol ( 88%). Mp 60-61 °C (*n*-hexane/AcOEt), light yellowish solid; <sup>1</sup>H NMR δ 7.70 (dd, 1H, *J* = 7.2, 1.2 Hz, 1H), 7.62 (dd, 1H, *J* = 7.2, 1.0 Hz, 1H), 7.33 (t, *J* = 8.10 Hz, 1H), 3.94 (t, *J* = 6.8 Hz, 2H), 3.27 (t, *J* = 6.8 Hz, 2H), 2.01 (brs, 1H); <sup>13</sup>C NMR δ 151.97, 136.64, 133.74, 130.99, 127.90, 122.90, 61.07, 32.62; GC-MS *m/e* 201.02.

**2-(2-Amino-6-chloro-phenyl)-ethanol:<sup>2</sup>**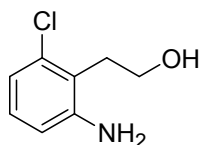

A typical reaction procedure is described for the synthesis of 2-(2-amino-6-chloro-phenyl)-ethanol. 2-(2-Chloro-6-nitro-phenyl)-ethanol (2.016 g, 10 mmol), Pd/C (5 wt %, 1 mol%), ethylacetate (5.0 mL) were placed in a 100-mL round bottomed flask equipped with a Hydrogen balloon . The reaction mixture was stirred for 6 h at room temperature. Then the catalyst was filtered off and after removal of the solvent, the residue was purified by column chromatography (*n*-hexane:AcOEt = 3:1) to give 2-(2-amino-6-chloro-phenyl)-ethanol ( 90%).

**References**

1. K. Fujita, K. Yamamoto and R. Yamaguchi, *Org. Lett.*, 2002, **4**, 2691.
2. Y. Tsuji, S. Kotachi, K. Huh and Y. Watanabe, *J. Org. Chem.*, 1990, **55**, 580.
